# Supplementary material for: Chemical Modification of Microcin J25 Reveals New Insights on the Stereospecific Requirements for Antimicrobial Activity
Source: PubMed Central journal article supplement (PMC6829517; doi:10.3390/ijms20205152), 2019-10-17
Supplement: ijms-20-05152-s001.pdf [file ijms-20-05152-s001.pdf]

## Supplementary Material

### Content

|                                   |    |
|-----------------------------------|----|
| Materials and Methods.....        | 2  |
| Characterization of Peptides..... | 3  |
| Native MccJ25 .....               | 3  |
| New Compound.....                 | 3  |
| Figures and Tables .....          | 3  |
| References.....                   | 25 |

## Materials and Methods

**Materials and reagents.** Methanol was purchased from Scharlau, while acetonitrile was obtained from SDS. NaOH, 2,2,2-trifluoroethanol, pepsin, thermolysin were obtained from Sigma-Aldrich, while carboxypeptidase Y was purchased from Alfa Aesar. *E. coli* BL21 (DE3), which was used for heterologous expression, was purchased from Invitrogen. Bacterial strains were isolated from clinical specimens in the Microbiology Service of the Hospital Universitari de Bellvitge (Spain). Collistin sulfate was supplied by Zhejiang Shenghua Biok Biology Co. LTD, China. Mueller-Hinton Broth (MHB) was obtained from Scharlau (Spain).

**Chemical Treatment.** 0.1 mg of pure native MccJ25 was dissolved in 30  $\mu$ L H<sub>2</sub>O-ACN (1:1) and 10  $\mu$ L of 0.5 M NaOH was added. The reaction mixture was stirred at 40°C, and after 8, 16, 24 and 48 h an aliquot of sample was neutralized with 5  $\mu$ L of 0.5 M HCl and analyzed by RP-HPLC and LC-MS. The optimum time for the treatment was found to be 16 h. For the isolation and purification of the new compound, 5.3 mg (2.5  $\mu$ mol, 1 eq.) of pure native MccJ25 was dissolved in 400  $\mu$ L of H<sub>2</sub>O-ACN (1:1). Then, 30  $\mu$ L of NaOH 0.5 M (pH 12) was added, and the mixture was stirred overnight at 40°C. The reaction was then neutralized by adding 10  $\mu$ L of HCl 0.5 M and purified by semi-analytical RP-HPLC using a Sunfire® C18 OBD™ Prep Column 5- $\mu$ m (10 $\times$ 150 mm) reversed-phase column and a linear gradient (30% to 35% over 15 min) of ACN with a flow rate of 2.0 mL/min to obtain 1.50 mg of the new compound and 1.24 mg of native MccJ25 (which did not react) both with a purity > 99.9% (Fig. S10,11).

## Stability Assays

**Carboxypeptidase Y.** Purified peptide (0.5  $\mu$ g) was dissolved in 25  $\mu$ L of MES buffer (50 mM MES, 1 mM CaCl<sub>2</sub> at pH 6.75). 10  $\mu$ L of carboxypeptidase Y solution in MES buffer (1 mg/mL) was added to the peptide solution and incubated for 4 h at 25°C. The reaction was quenched by the addition of 75  $\mu$ L of ACN and then filtered and analyzed by LC-MS.

**Pepsin.** Purified peptide (20  $\mu$ g) was dissolved in 150  $\mu$ L HCl 0.01 M (pH 2). 40  $\mu$ L of pepsin solution in HCl 0.01 M (1 mg/mL) was added to the peptide solution and incubated for 2-20 h at 37 °C. The reaction was quenched by the addition of 0.05 M NaOH until pH 8-8.5, filtered and analyzed via LC-MS.

**Thermolysin.** Purified peptide (5-10  $\mu$ g) was dissolved in 50  $\mu$ L of buffer (50 mM Tris, 0.5 mM CaCl<sub>2</sub> at pH 8). 15  $\mu$ L of thermolysin solution in buffer (1 mg/mL) was added to the peptide

solution and incubated for 30 min and 2 h at 70 °C. The reaction was quenched by the addition of 4 M HCl until pH 2 was reached, and then filtered and analyzed by LC-MS.

**Thermal.** Purified peptide (10 µg) was dissolved in 100 µL of H<sub>2</sub>O-ACN (1:1, v/v) and incubated at 95 °C for 1, 2, 3 and 4 h. Samples were cooled to 4°C and analyzed by LC-MS.

## Characterization of Peptides

### Native MccJ25

Analytical HPLC (linear gradient from 25% to 40% B in 40 min;  $t_R$  = 20.894, 99.9% purity) and LC-MS (ESI<sup>+</sup>)  $m/z$  calculated for C<sub>101</sub>H<sub>139</sub>N<sub>23</sub>O<sub>27</sub> [M+H]<sup>+</sup> 2106.02, found 2107.93. Production yield: 15.6 mg/L (Figure S19).

### New Compound

Analytical HPLC (linear gradient from 25% to 40% B in 40 min;  $t_R$  = 18.791, 99.9% purity) and LC-MS (ESI<sup>+</sup>)  $m/z$  calculated for C<sub>101</sub>H<sub>139</sub>N<sub>23</sub>O<sub>27</sub> [M+H]<sup>+</sup> 2106.02, found 2107.78 (Figure S20).

## Figures and Tables

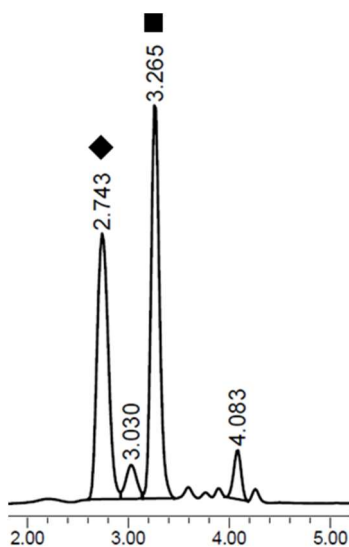

**Figure S1.** RP-HPLC chromatogram after the treatment with base of the native MccJ25. Conditions: XBridge C18 2.5 µm (4.6 mm x 75 mm) reversed-phase analytical column; linear gradient from 25% to 50% of ACN over 8 min at 25°C. ■ = starting material, ◆ = new compound.

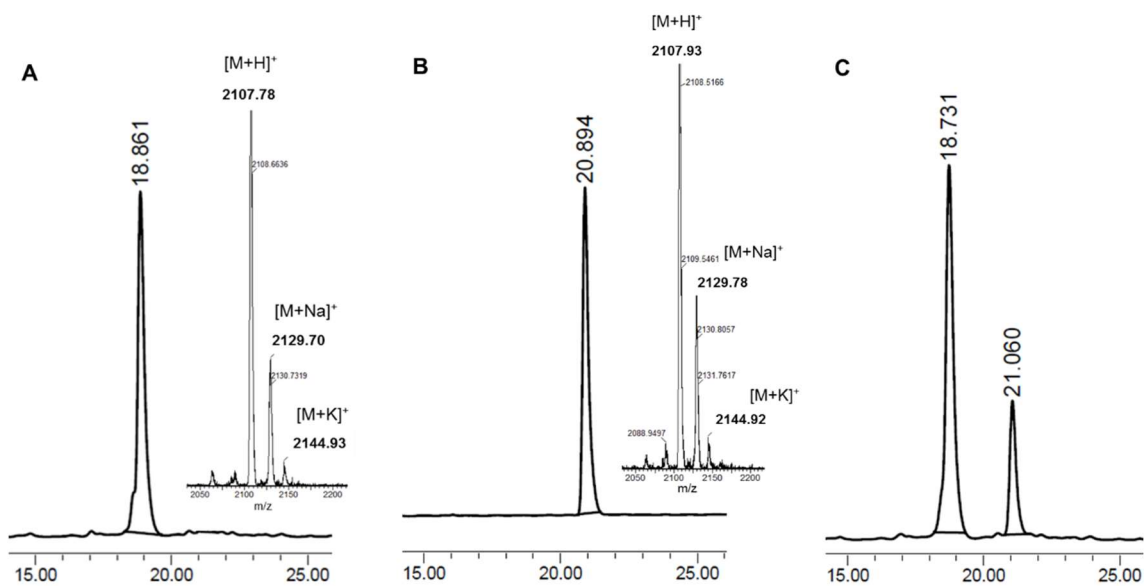

**Figure S2.** RP-HPLC chromatograms and ESI<sup>+</sup> spectra of: (A) the new compound after treatment with a base, (B) native MccJ25 and (C) co-injection of both. Conditions: Phenomenex Luna C18 5  $\mu\text{m}$  (4.6 mm x 250 mm) reversed-phase analytical column; linear gradient from 25% to 40% of ACN over 40 min at 60°C.

| Strains                       | FIC <sub>i</sub> |
|-------------------------------|------------------|
| <i>E. coli</i> MDR 39255      | 0.40             |
| <i>S. enterica</i> ATCC 13076 | 0.41             |
| <i>E. coli</i> MDR 208691     | 0.52             |
| <i>E. coli</i> MDR 239910     | 0.54             |

**Table S1.** Fractional Inhibitory Concentration index (FIC<sub>i</sub>) values of the new compound in combination with colistin.

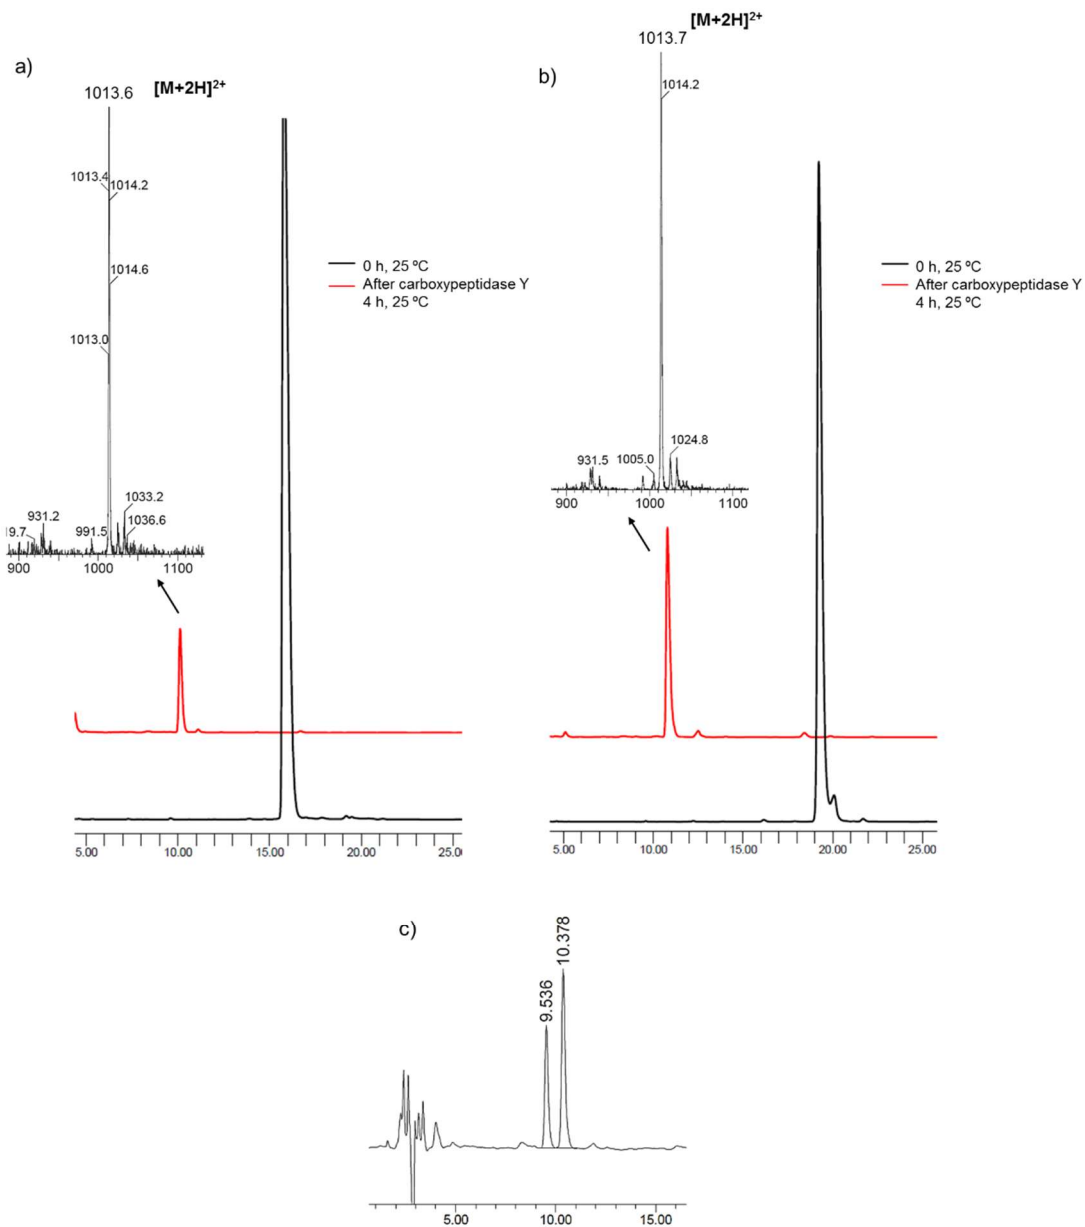

**Figure S3.** RP-HPLC chromatograms and ESI<sup>+</sup> spectra of the carboxypeptidase Y assay of the a) new compound, b) native MccJ25 and c) co-injection of the two peptides after the carboxypeptidase Y cleavage. Conditions: Phenomenex Luna C18 5  $\mu$ m (4.6 mm x 250 mm) reversed-phase analytical column; linear gradient from 25% to 40% of ACN over 40 min at 25°C.

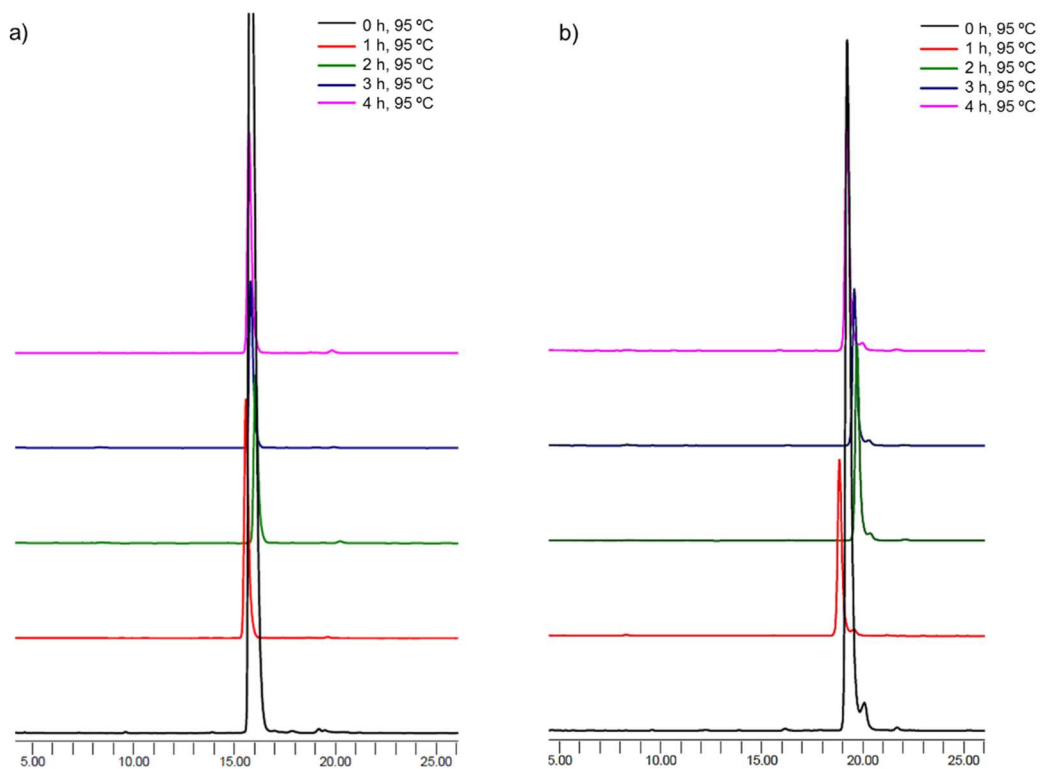

**Figure S4.** RP-HPLC chromatograms of the heat stability at 95°C of the a) new compound and b) native MccJ25. Conditions: Phenomenex Luna C18 5  $\mu\text{m}$  (4.6 mm  $\times$  250 mm) reversed-phase analytical column; linear gradient from 25% to 40% of ACN over 40 min at 25°C.

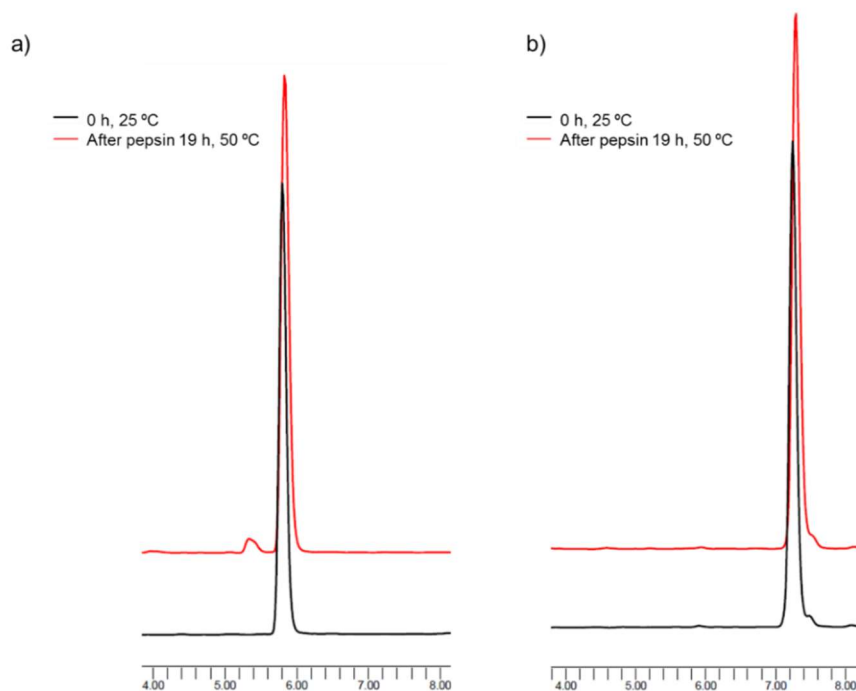

**Figure S5.** RP-HPLC chromatograms of the pepsin assay of the a) new compound and b) native MccJ25. Conditions: XBridge C18 2.5  $\mu\text{m}$  (4.6 mm  $\times$  75 mm) reversed-phase analytical column; linear gradient from 25% to 35% of ACN over 8 min at 25°C.

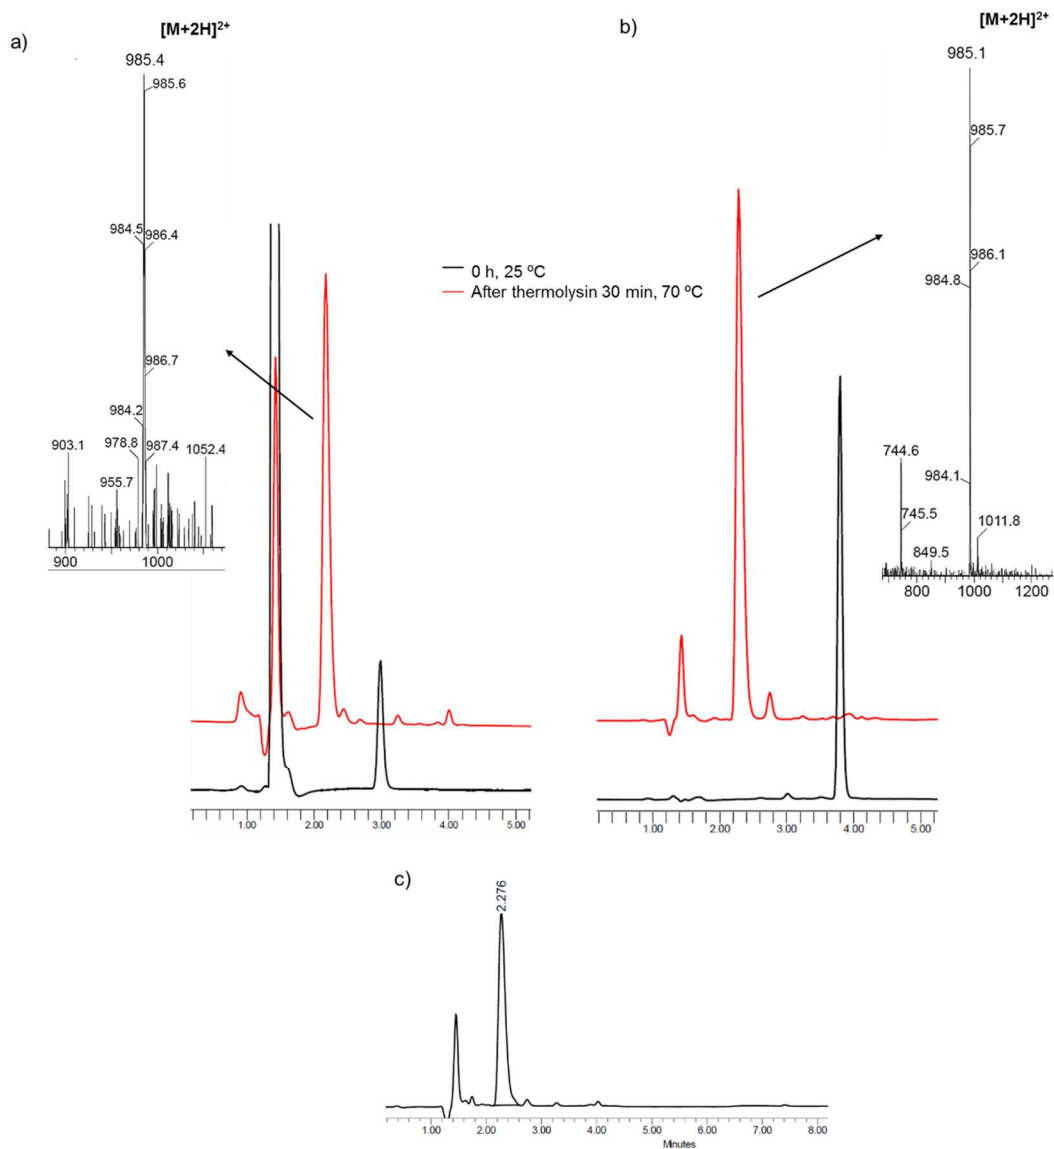

**Figure S6.** RP-HPLC chromatograms and ESI<sup>+</sup> spectra after 30 min of thermolysin treatment at 70°C in 50 mM TRIS pH 8, 0.5 mM CaCl<sub>2</sub> buffer. a) New compound, b) native MccJ25 and c) co-injection of the two peptides after the thermolysin cleavage. Conditions: XBridge C18 2.5 μm (4.6 mm × 75 mm) reversed-phase analytical column; linear gradient from 30% to 60% of ACN over 8 min at 25°C.

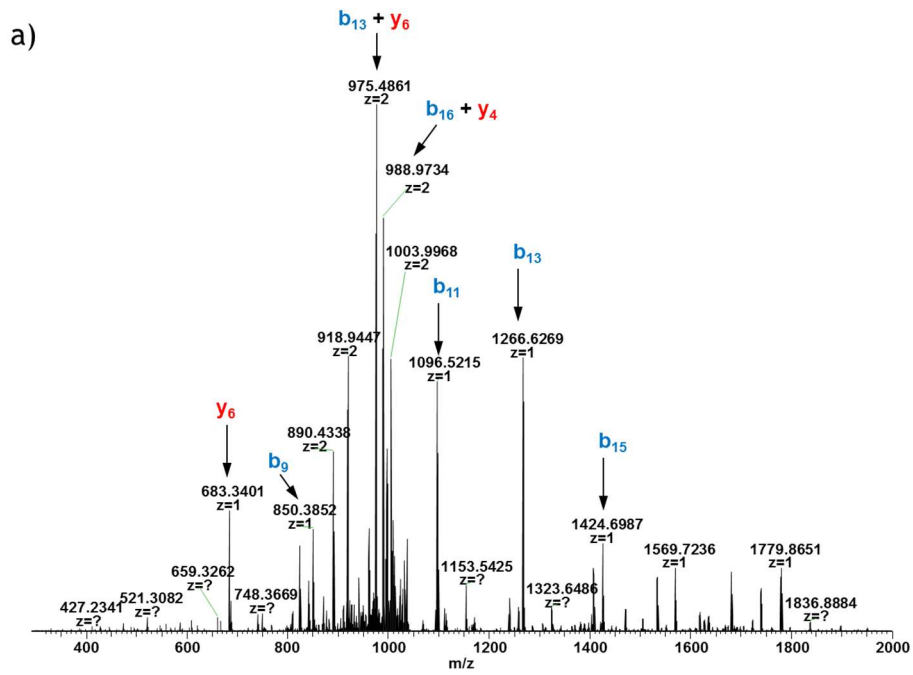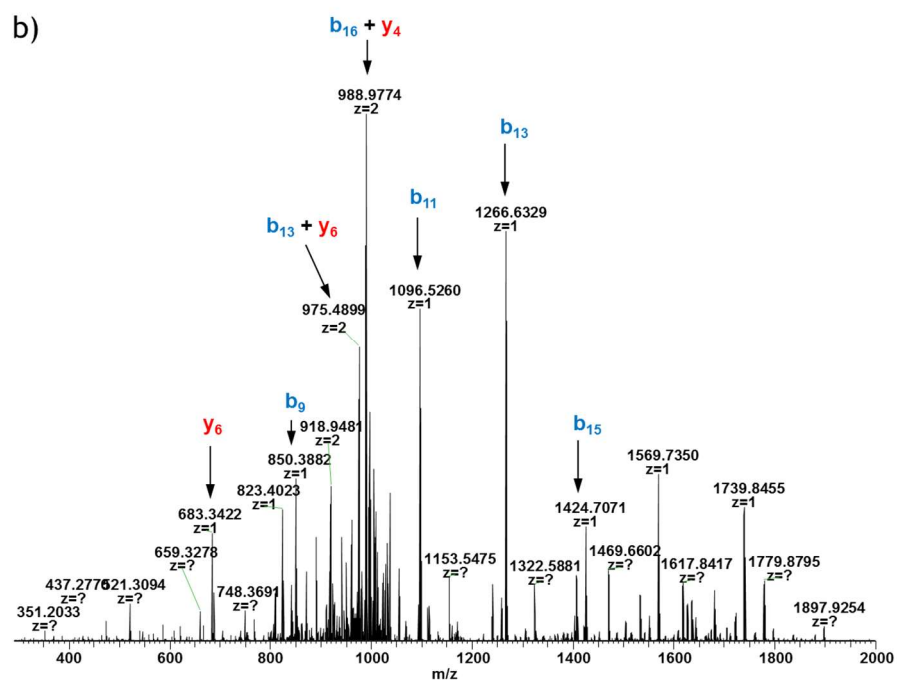



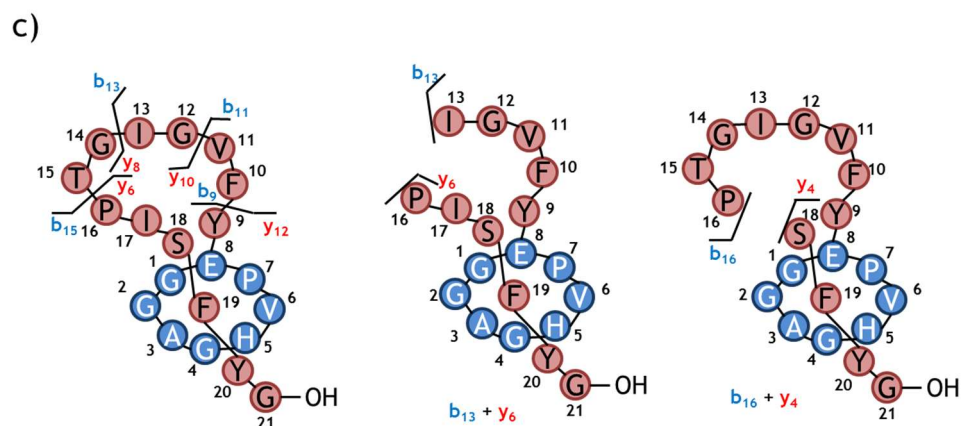

**Figure S7.** MS<sup>2</sup> fragmentation spectrum of the: a) new compound, b) native MccJ25 and c) schematic representation of the fragmentations derived from the MS<sup>2</sup> analysis.

| Peptide       | Most intense fragmentation | Description                                                    |
|---------------|----------------------------|----------------------------------------------------------------|
| New compound  | $b_{13} + y_6$             | Fragmentation around N-terminus Pro16. Loss of Gly14 and Thr15 |
| Native MccJ25 | $b_{16} + y_4$             | Fragmentation around C-terminus of Pro16. Loss of Ile17        |

**Table S2.** Summary of the main MS<sup>2</sup> fragmentations

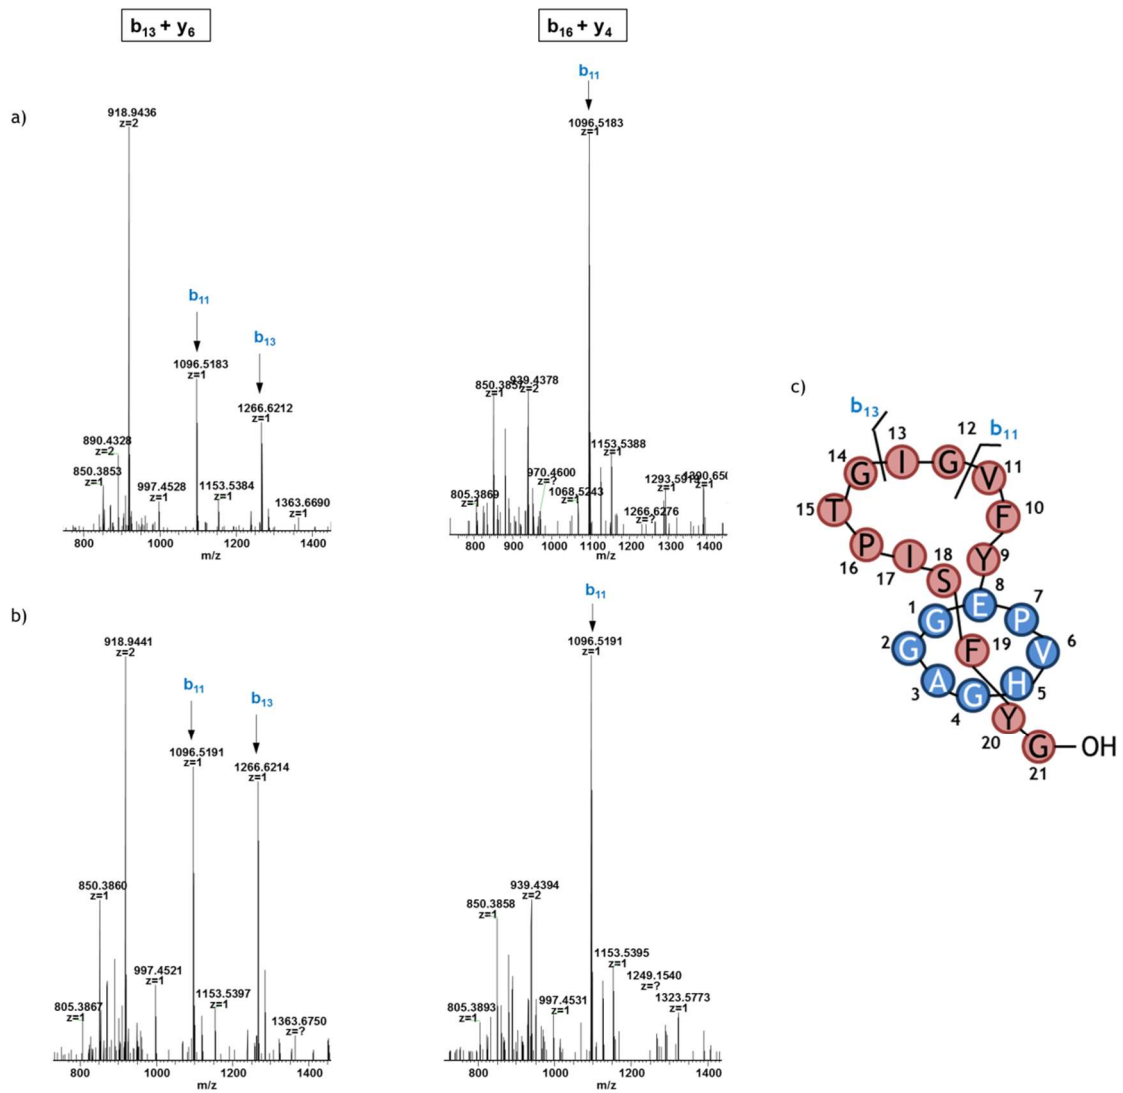

**Figure S8.** MS<sup>3</sup> spectrum of the  $b_{13} + y_6$  and  $b_{16} + y_4$  fragments of the: a) new compound, b) native MccJ25 and c) schematic representation of the fragmentations derived from the MS<sup>3</sup> analysis.

| Peptides         | Charge state           | no. of conformations | CCS (Å <sup>2</sup> ) (Ratio (%))           |
|------------------|------------------------|----------------------|---------------------------------------------|
| New compound     | [M + 2H] <sup>2+</sup> | 4                    | 315 (11)/370 (40)/ <b>396 (47)</b> /442     |
|                  | [M + 3H] <sup>3+</sup> | 3                    | 361 (10)/ <b>382 (85)</b> /435 (5)          |
|                  | [M + 4H] <sup>4+</sup> | 2                    | <b>375 (77)</b> /409 (23)                   |
| Native MccJ25    | [M + 2H] <sup>2+</sup> | 4                    | 315 (14)/360 (14)/ <b>379 (67)</b> /437 (4) |
|                  | [M + 3H] <sup>3+</sup> | 3                    | 363 (14)/ <b>379 (75)</b> /427 (11)         |
|                  | [M + 4H] <sup>4+</sup> | 2                    | <b>380 (77)</b> /417 (23)                   |
| Native MccJ25[1] | [M + 2H] <sup>2+</sup> | 3                    | <b>373 (63)</b> /383 (27)/393 (10)          |
|                  | [M + 3H] <sup>3+</sup> | 1                    | 383 (100)                                   |
|                  | [M + 4H] <sup>4+</sup> | 2                    | <b>404 (88)</b> /442 (12)                   |

**Table S3.** Number of conformations and CCS with 400 mM of sulfolane. Charge state [M + H]<sup>+</sup> is not shown because is a very unfolded structure with the highest drift time values and is not relevant for the comparison. Each CCS was calculated based on the drift times.[2] When several conformations were evidenced, the major species is highlighted in bold. Reported CCS values of native MccJ25 from previous work.[1]

| Peptides         | [M + 2H] <sup>2+</sup>            | [M + 3H] <sup>3+</sup>            | [M + 4H] <sup>4+</sup>            | $\Delta\Omega$ (Å <sup>2</sup> ) | $\Delta\Omega/\Omega$ (%) |
|------------------|-----------------------------------|-----------------------------------|-----------------------------------|----------------------------------|---------------------------|
|                  | CCS ( $\Omega$ , Å <sup>2</sup> ) | CCS ( $\Omega$ , Å <sup>2</sup> ) | CCS ( $\Omega$ , Å <sup>2</sup> ) |                                  |                           |
| New compound     | 396                               | 382                               | 375                               | 21                               | 5.3                       |
| Native MccJ25    | 379                               | 379                               | 380                               | 1                                | 0.3                       |
| Native MccJ25[1] | 373                               | 383                               | 404                               | 31                               | 7.7                       |

**Table S4.** CCS values ( $\Omega$ ) of the main conformation from the ion mobility spectra. Range of CCS ( $\Delta\Omega$ ) and  $\Delta\Omega/\Omega$  parameter that indicates the relative range of CCS covered by all protonated molecule. Reported CCS values of native MccJ25 from previous work.[1]

| Residue | Atom       | $\delta_H$ | $\delta_C$ | Residue    | Atom       | $\delta_H$ | $\delta_C$ |
|---------|------------|------------|------------|------------|------------|------------|------------|
| Gly1    | NH         | 7.93       |            | Gly12      | NH         | 8.16       |            |
|         | $\alpha$   | 4.31; 3.54 | 43.82      |            | $\alpha$   | 3.99; 3.76 | 43.47      |
| Gly2    | NH         | 8.98       |            | Ile13      | NH         | 8.32       |            |
|         | $\alpha$   | 4.22; 3.87 | 45.24      |            | $\alpha$   | 4.16       | 59.37      |
| Ala3    | NH         | 8.52       |            | $\beta$    | 1.93       | 36.31      |            |
|         | $\alpha$   | 4.67       | 49.06      | $\gamma$   | 1.20; 1.54 | 25.70      |            |
|         | $\beta$    | 1.31       | 18.05      | $\gamma$   | 0.93       | 15.66      |            |
| Gly4    | NH         | 7.74       |            | $\delta$   | 0.89       | 10.94      |            |
|         | $\alpha$   | 4.05; 3.52 | 43.71      | Gly14      | NH         | 8.44       |            |
| His5    | NH         | 7.50       |            | $\alpha$   | 4.06; 3.62 | 43.95      |            |
|         | $\alpha$   | 4.66       | 54.11      | Thr15      | NH         | 7.90       |            |
|         | $\beta$    | 3.27; 2.92 | 29.56      | $\alpha$   | 4.73       | 58.04      |            |
|         | $\delta$   | 7.33       | 118.13     | $\beta$    | 4.10       | 68.27      |            |
| Val6    | $\epsilon$ | 8.67       | 134.57     | $\gamma$   | 1.21       | 19.59      |            |
|         | NH         | 8.75       |            | Pro16      | $\alpha$   | 4.49       | 61.02      |
|         | $\alpha$   | 4.70       | 57.83      | $\beta$    | 1.83; 1.72 | 30.57      |            |
|         | $\beta$    | 1.79       | 31.86      | $\gamma$   | 2.16; 1.96 | 25.54      |            |
|         | $\gamma$   | 1.10       | 19.42      | $\delta$   | 4.01; 3.86 | 48.79      |            |
| Pro7    | $\gamma$   | 0.85       | 19.08      | Ile17      | NH         | 7.97       |            |
|         | $\alpha$   | 4.22       | 61.94      | $\alpha$   | 4.44       | 58.41      |            |
|         | $\beta$    | 1.80; 1.69 | 30.89      | $\beta$    | 1.87       | 34.81      |            |
|         | $\gamma$   | 2.26; 1.99 | 26.36      | $\gamma$   | 1.08; 1.43 | 25.72      |            |
| Glu8    | $\delta$   | 4.13; 3.81 | 49.06      | $\gamma$   | 0.85       | 16.16      |            |
|         | NH         | 8.34       |            | $\delta$   | 0.85       | 11.70      |            |
|         | $\alpha$   | 4.40       | 53.67      | Ser18      | NH         | 7.35       |            |
|         | $\beta$    | 1.68; 1.68 | 27.95      | $\alpha$   | 4.39       | 56.59      |            |
| Tyr9    | $\gamma$   | 1.96; 1.84 | 33.24      | $\beta$    | 4.07; 3.85 | 62.00      |            |
|         | NH         | 7.33       |            | Phe19      | NH         | 8.86       |            |
|         | $\alpha$   | 4.56       | 55.69      | $\alpha$   | 5.43       | 56.79      |            |
|         | $\beta$    | 2.88; 2.65 | 38.76      | $\beta$    | 2.57; 2.57 | 42.97      |            |
| Phe10   | $\delta$   | 6.94       | 131.09     | $\delta$   | 6.87       | 130.19     |            |
|         | $\epsilon$ | 6.59       | 115.77     | $\epsilon$ | 7.07       | 128.62     |            |
|         | NH         | 8.29       |            | $\zeta$    | 7.17       | 129.01     |            |
|         | $\alpha$   | 4.86       | 55.62      | Tyr20      | NH         | 9.50       |            |
|         | $\beta$    | 2.94; 2.76 | 39.86      | $\alpha$   | 4.89       | 55.47      |            |
| Val11   | $\delta$   | 7.07       | 130.02     | $\beta$    | 2.99; 2.99 | 39.12      |            |
|         | $\epsilon$ | 7.13       | 127.38     | $\delta$   | 6.95       | 131.45     |            |
|         | $\zeta$    | 7.16       | 127.44     | $\epsilon$ | 6.69       | 116.03     |            |
|         | NH         | 8.26       |            | Gly21      | NH         | 8.58       |            |
|         | $\alpha$   | 4.28       | 59.54      | $\alpha$   | 3.81; 3.73 | 43.01      |            |
|         | $\beta$    | 2.13       | 32.03      |            |            |            |            |
|         | $\gamma$   | 0.92       | 19.62      |            |            |            |            |
|         | $\gamma$   | 0.91       | 18.22      |            |            |            |            |

Table S5. Chemical shifts of  $^1\text{H}$  and  $^{13}\text{C}$  (ppm) for the native MccJ25 in  $\text{CD}_3\text{OH}$  at 298K.

| Residue | Atom       | $\delta_H$ | $\delta_C$ | Residue    | Atom       | $\delta_H$ | $\delta_C$ |
|---------|------------|------------|------------|------------|------------|------------|------------|
| Gly1    | NH         | 7.97       |            | Gly12      | NH         | 8.39       |            |
|         | $\alpha$   | 4.21, 3.64 | 43.76      |            | $\alpha$   | 4.22, 3.57 | 43.70      |
| Gly2    | NH         | 8.86       |            | Ile13      | NH         | 7.89       |            |
|         | $\alpha$   | 4.33, 3.82 | 45.09      |            | $\alpha$   | 4.29       | 59.68      |
| Ala3    | NH         | 8.43       |            | $\beta$    | 1.92       | 37.52      |            |
|         | $\alpha$   | 4.67       | 49.01      | $\gamma$   | 1.48, 1.16 | 25.66      |            |
|         | $\beta$    | 1.31       | 18.04      | $\gamma$   | 0.95       | 15.83      |            |
| Gly4    | NH         | 7.80       |            | $\delta$   | 0.80       | 10.76      |            |
|         | $\alpha$   | 4.09, 3.58 | 43.74      | Gly14      | NH         | 8.57       |            |
| His5    | NH         | 7.79       |            | $\alpha$   | 3.73, 4.07 | 43.77      |            |
|         | $\alpha$   | 4.48       | 55.71      | Thr15      | NH         | 7.59       |            |
|         | $\beta$    | 3.31, 2.87 | 29.57      | $\alpha$   | 4.63       | 57.96      |            |
|         | $\delta$   | 7.29       | 117.54     | $\beta$    | 4.03       | 68.39      |            |
| Val6    | $\epsilon$ | 8.51       | 133.98     | $\gamma$   | 1.21       | 19.88      |            |
|         | NH         | 8.95       |            | Pro16      | $\alpha$   | 4.67       | 61.07      |
|         | $\alpha$   | 4.77       | 57.52      | $\beta$    | 1.79, 1.82 | 30.27      |            |
|         | $\beta$    | 1.91       | 32.15      | $\gamma$   | 2.10, 1.91 | 25.48      |            |
|         | $\gamma$   | 1.15       | 19.48      | $\delta$   | 3.91, 3.82 | 48.78      |            |
| Pro7    | $\gamma$   | 0.87       | 18.83      | Ile17      | NH         | 8.08       |            |
|         | $\alpha$   | 4.33       | 61.86      | $\alpha$   | 4.34       | 58.13      |            |
|         | $\beta$    | 1.84, 1.53 | 30.40      | $\beta$    | 1.77       | 37.82      |            |
|         | $\gamma$   | 2.21, 1.95 | 26.63      | $\gamma$   | 1.35, 1.05 | 25.53      |            |
|         | $\delta$   | 4.04, 3.76 | 49.04      | $\gamma$   | 0.77       | 15.55      |            |
| Glu8    | NH         | 7.90       |            | $\delta$   | 0.75       | 11.35      |            |
|         | $\alpha$   | 4.28       | 53.45      | Ser18      | NH         | 7.80       |            |
|         | $\beta$    | 1.78       | 27.69      | $\alpha$   | 4.36       | 57.50      |            |
|         | $\gamma$   | 2.01, 1.93 | 34.27      | $\beta$    | 3.24, 3.82 | 62.90      |            |
| Tyr9    | NH         | 7.84       |            | Phe19      | NH         | 8.84       |            |
|         | $\alpha$   | 4.51       | 55.89      | $\alpha$   | 5.52       | 55.23      |            |
|         | $\beta$    | 2.84, 2.60 | 38.22      | $\beta$    | 2.68, 2.54 | 49.85      |            |
|         | $\delta$   | 6.95       | 131.37     | $\delta$   | 6.94       | 130.48     |            |
|         | $\epsilon$ | 6.60       | 115.86     | $\epsilon$ | 7.11       | 127.07     |            |
| Phe10   | NH         | 8.31       |            | $\zeta$    | 7.11       | 128.47     |            |
|         | $\alpha$   | 4.64       | 55.77      | Tyr20      | NH         | 9.55       |            |
|         | $\beta$    | 3.09, 2.94 | 38.54      | $\alpha$   | 4.97       | 55.61      |            |
|         | $\delta$   | 7.20       | 129.77     | $\beta$    | 3.03       | 39.43      |            |
|         | $\epsilon$ | 7.13       | 127.32     | $\delta$   | 6.97       | 131.35     |            |
|         | $\zeta$    | 7.24       | 129.19     | $\epsilon$ | 6.74       | 116.18     |            |
| Val11   | NH         | 8.42       |            | Gly21      | NH         | 8.49       |            |
|         | $\alpha$   | 3.87       | 61.74      | $\alpha$   | 3.73, 3.49 | 44.54      |            |
|         | $\beta$    | 2.06       | 30.71      |            |            |            |            |
|         | $\gamma$   | 0.89       | 19.18      |            |            |            |            |
|         | $\gamma$   | 0.89       | 19.18      |            |            |            |            |

Table S6. Chemical shifts of  $^1\text{H}$  and  $^{13}\text{C}$  (ppm) for the new compound in  $\text{CD}_3\text{OH}$  at 298K.

| <b>Residue</b> | <b><math>^3J_{\text{NH-}\alpha\text{H}}</math> (Hz)</b> | <b><math>\Phi</math></b> | <b>Residue</b> | <b><math>^3J_{\text{NH-}\alpha\text{H}}</math> (Hz)</b> | <b><math>\Phi</math></b> |
|----------------|---------------------------------------------------------|--------------------------|----------------|---------------------------------------------------------|--------------------------|
| <b>Gly1</b>    | 8.2; 3.9                                                | -150.5                   | <b>Gly12</b>   | ND                                                      |                          |
| <b>Gly2</b>    | 6.6                                                     | -137.7                   | <b>Ile13</b>   | 8.4                                                     | -151.6                   |
| <b>Ala3</b>    | 8.5                                                     | -152.9                   | <b>Gly14</b>   | 6.2                                                     | -135.2                   |
| <b>Gly4</b>    | 7.3                                                     | -143.1                   | <b>Thr15</b>   | 8.3                                                     | -151.6                   |
| <b>His5</b>    | 10.0                                                    | -171.9                   | <b>Pro16</b>   |                                                         |                          |
| <b>Val6</b>    | 9.1                                                     | -158.4                   | <b>Ile17</b>   | 9.5                                                     | -163.7                   |
| <b>Pro7</b>    |                                                         |                          | <b>Ser18</b>   | 7.2                                                     | -142.2                   |
| <b>Glu8</b>    | 9.1                                                     | -158.4                   | <b>Phe19</b>   | 10.9                                                    | --                       |
| <b>Tyr9</b>    | 7.2                                                     | -142.2                   | <b>Try20</b>   | 7.9                                                     | -148.2                   |
| <b>Phe10</b>   | 8.9                                                     | -156.9                   | <b>Gly21</b>   | 5.8                                                     | -132.1                   |
| <b>Val11</b>   | 8.5                                                     | -152.9                   |                |                                                         |                          |

**Table S7:** Coupling constant  $^3J_{\text{NH-}\alpha\text{H}}$  and dihedral torsion angles ( $\Phi$ ) from the 1D spectrum for the native MccJ25 in CD<sub>3</sub>OH at 298K. Values in italics are approximated due to peak overlapping. ND = not determined.

| Residue | $^3J_{\text{NH-}\alpha\text{H}}$ (Hz) | $\Phi$ | Residue | $^3J_{\text{NH-}\alpha\text{H}}$ (Hz) | $\Phi$ |
|---------|---------------------------------------|--------|---------|---------------------------------------|--------|
| Gly1    | 6.2                                   | -135.2 | Gly12   | 6.2                                   | -135.2 |
| Gly2    | 8.5                                   | -152.9 | Ile13   | 7.2                                   | -142.2 |
| Ala3    | 8.7                                   | -155.5 | Gly14   | 6.1                                   | -134.4 |
| Gly4    | ND                                    |        | Thr15   | 7.1                                   | -141.3 |
| His5    | ND                                    |        | Pro16   |                                       |        |
| Val6    | 9.1                                   | -158.4 | Ile17   | 9.3                                   | -161.8 |
| Pro7    |                                       |        | Ser18   | ND                                    |        |
| Glu8    | 7.2                                   | -142.2 | Phe19   | 8.5                                   | -152.9 |
| Tyr9    | 7.5                                   | -145.1 | Try20   | 7.8                                   | -147.1 |
| Phe10   | 7.0                                   | -141.3 | Gly21   | 5.8                                   | -132.1 |
| Val11   | 8.7                                   | -155.5 |         |                                       |        |

**Table S8:** Coupling constant  $^3J_{\text{NH-}\alpha\text{H}}$  and dihedral torsion angles ( $\Phi$ ) from the 1D spectrum for the new compound in CD<sub>3</sub>OH at 298K. Values in italics are approximated due to peak overlapping. ND = not determined.

| $\beta$ -hairpin     | NOEs                                          | Native MccJ25 | New compound |
|----------------------|-----------------------------------------------|---------------|--------------|
|                      | $\alpha\text{H Pro7} - \alpha\text{H Phe19}$  | X             | X            |
| <b>Val6 - Pro7</b>   | $\alpha\text{H Pro7} - \beta\text{H Phe19}$   | X             | X            |
| <b>Tyr20 - Phe19</b> | $\alpha\text{H Phe19} - \alpha\text{H Pro7}$  | X             | X            |
|                      | $\delta\text{H Pro7} - \alpha\text{H Val6}$   | X             | X            |
|                      | $\alpha\text{H Pro16} - \alpha\text{H Phe10}$ | X             | -            |
| <b>Phe10 - Val11</b> | $\alpha\text{H Val11} - \delta\text{H Pro16}$ | X             | -            |
| <b>Pro16 - Thr15</b> | $\delta\text{H Pro16} - \alpha\text{H Val11}$ | X             | -            |
|                      | $\delta\text{H Pro16} - \alpha\text{H Thr15}$ | X             | X            |

**Table S9.** NOE cross-peaks of the two  $\beta$ -hairpin of the two peptides.

| Val11    | NOE                               | Native MccJ25 | New compound |
|----------|-----------------------------------|---------------|--------------|
|          | $\alpha$ H Phe10                  | X             | X            |
|          | <b><math>\beta</math>H Phe10</b>  | -             | X            |
|          | <b>NH Phe10</b>                   | -             | X            |
| NH       | NH Ile17                          | X             | X            |
|          | $\delta$ H Ile17                  | X             | X            |
|          | $\gamma$ H Ile17                  | -             | X            |
|          | <b>NH Thr15</b>                   | -             | X            |
| $\alpha$ | <b><math>\delta</math>H Pro16</b> | X             | -            |
|          | NH Gly12                          | X             | X            |
| $\beta$  | <b><math>\beta</math>H Pro16</b>  | X             | -            |
|          | $\gamma$ H Pro16                  | X             | -            |
|          | NH Gly12                          | X             | -            |
| $\gamma$ | $\beta$ H Ile13                   | X             | X            |
|          | $\alpha$ H Pro16                  | X             | -            |
|          | NH Gly12                          | X             | -            |
|          | $\alpha$ H Gly12                  | X             | -            |
|          | $\beta$ H Phe10                   | X             | -            |
|          | $\delta$ H Ile17                  | -             | X            |
|          | $\epsilon$ H Tyr9                 | -             | X            |
|          | <b><math>\alpha</math>H Thr15</b> | -             | X            |
|          | <b><math>\beta</math>H Thr15</b>  | -             | X            |

**Table S10.** NOE cross-peaks for the residue Val11 for the native MccJ25 and the new compound. The most intense NOEs for the native MccJ25 are highlighted in black. The most remarkable cross-peaks observed for the new product are highlighted in red.



| Val11    | NOE              | Native MccJ25 | New compound |
|----------|------------------|---------------|--------------|
|          | $\alpha$ H Phe10 | 188133.1      | 798302.6     |
| NH       | $\beta$ H Phe10  | -             | 64860.0      |
|          | NH Phe10         | -             | 243370.5     |
|          | NH Ile17         | 221695.1      | w            |
| $\alpha$ | NH Gly12         | 320263.2      | 547478.7     |

**Table S11.** Intensities of the main NOE cross-peaks of Val11 residue from the new compound.

w = cross peak with very low intensity.

| Atoms                                | Distance (Å) | Atoms                               | Distance (Å) |
|--------------------------------------|--------------|-------------------------------------|--------------|
| NH Val11 – $\beta$ H Phe10           | 3.0          | $\beta$ H Tyr9 – $\beta$ H Phe10    | 2.2          |
| NH Val11 – NH Ile17                  | 4.0          | NH Phe10 – NH Tyr9                  | 3.0          |
| $\alpha$ H Val11 – NH Gly12          | 2.2          | NH Phe10 – $\alpha$ H Tyr9          | 2.2          |
| $\alpha$ H Val11 – $\beta$ H Val11   | 2.2          | NH Phe10 – $\beta$ H Tyr9           | 2.2          |
| $\alpha$ H Val11 – $\gamma$ H Val11  | 2.2          | $\alpha$ H Phe10 – NH Val11         | 3.0          |
| $\beta$ H Val11 – $\beta$ H Pro16    | 4.0          | $\alpha$ H Ile13 – NH Tyr9          | 4.0          |
| $\beta$ H Val11 – $\gamma$ H Pro16   | 4.0          | NH Gly12 – NH Ile13                 | 2.2          |
| $\gamma$ H Val11 – $\alpha$ H aThr15 | 4.0          | NH Gly12 – NH Phe10                 | 3.0          |
| $\gamma$ H Val11- $\alpha$ H Val11   | 2.2          | $\alpha$ H Gly12 – NH Ile13         | 2.2          |
| $\gamma$ H Val11 – $\beta$ H Thr15   | 4.0          | NH Thr15 – NH Ile13                 | 3.0          |
| $\gamma$ H Val11 – $\delta$ H Ile17  | 4.0          | NH Thr15 – $\gamma$ H Ile13         | 3.0          |
| NH His5 – NH Gly1                    | 3.0          | $\delta$ H Pro16 – $\delta$ H Tyr9  | 3.0          |
| NH His5 – $\delta$ H His5            | 3.0          | $\delta$ H Tyr20 – NH Gly21         | 2.2          |
| $\alpha$ H Ser18 – NH Gly1           | 3.0          | $\delta$ H Phe19 – $\beta$ H1 Ser18 | 3.0          |
| $\alpha$ H Ser18 – NH Gly2           | 3.0          | $\delta$ H Phe19 – $\beta$ H2 Ser18 | 2.2          |
| NH Tyr9 – $\alpha$ H Glu8            | 2.2          | $\beta$ H Phe19 – $\delta$ H Tyr9   | 3.0          |
| NH Tyr9 – NH Ile17                   | 3.0          | $\alpha$ H Pro7 – $\alpha$ H Phe19  | 2.2          |
| NH Tyr9 – NH Phe10                   | 3.0          | $\alpha$ H Pro7 – $\beta$ H Phe19   | 2.2          |
| $\alpha$ H Tyr9 – NH Phe10           | 2.2          | $\delta$ H Pro7 – $\alpha$ H Val6   | 2.2          |
| $\alpha$ H Tyr9 – $\alpha$ H Phe10   | 2.2          | $\alpha$ H His5 – $\gamma$ H Val6   | 4.0          |

**Table S12.** Constrained distances extracted from the NOESY spectrum of the new compound in CD<sub>3</sub>OH at 298K. Force constant used of 100 kcal·mol<sup>-1</sup>·Å<sup>-2</sup>.

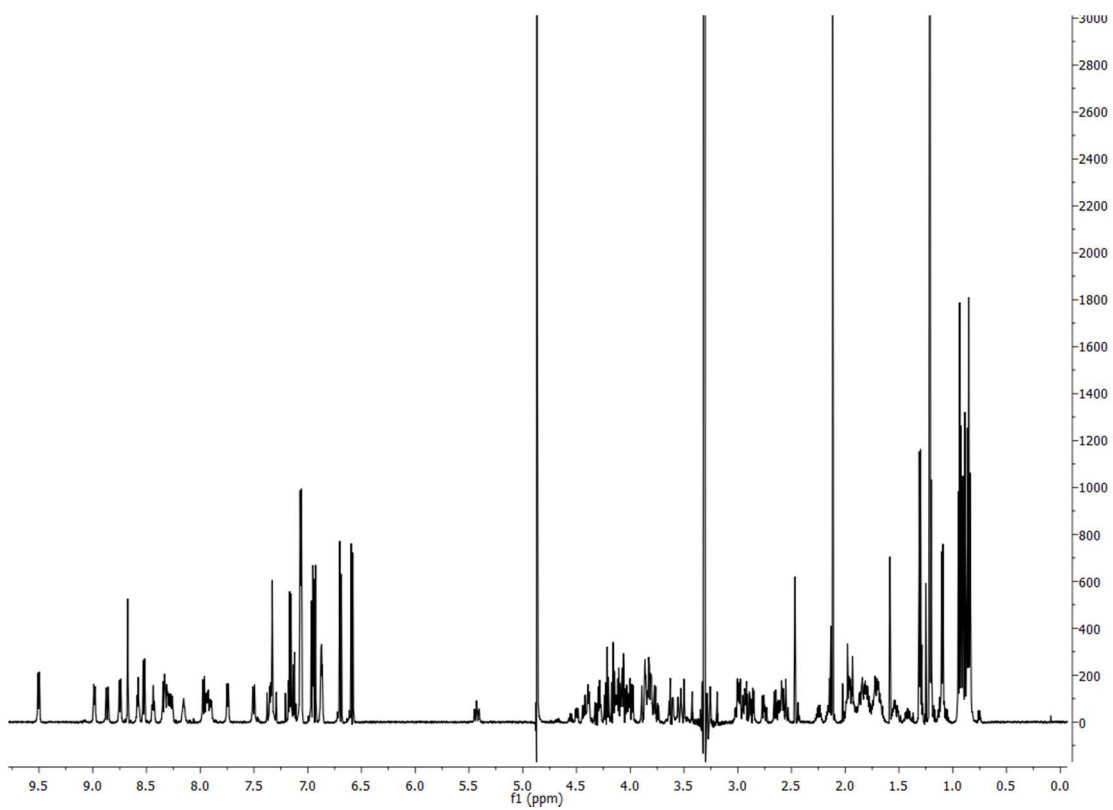

Figure S9.  $^1\text{H}$  spectrum of the native MccJ25 in  $\text{CD}_3\text{OH}$  at 298K.

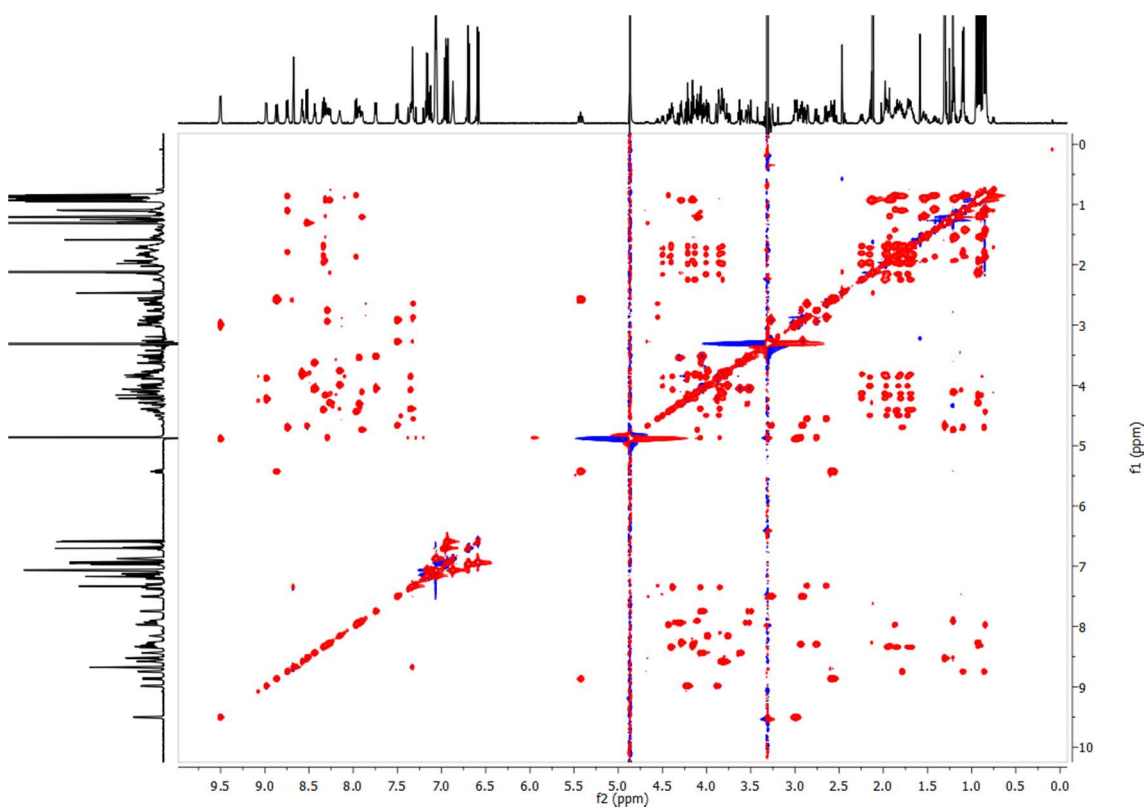

Figure S10. 2D TOCSY spectrum of the native MccJ25 in  $\text{CD}_3\text{OH}$  at 298K.

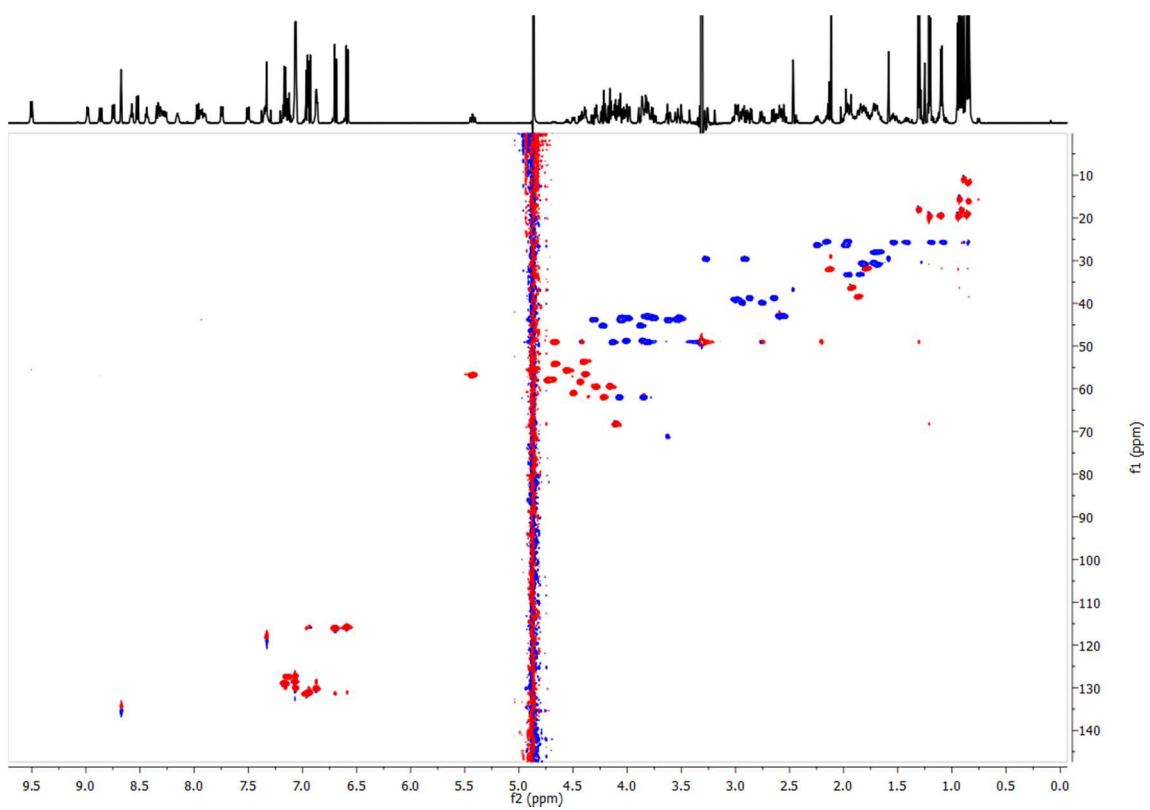

**Figure S11.** 2D  $^1\text{H}$ - $^{13}\text{C}$  HSQC spectrum of the native MccJ25 in  $\text{CD}_3\text{OH}$  at 298K.

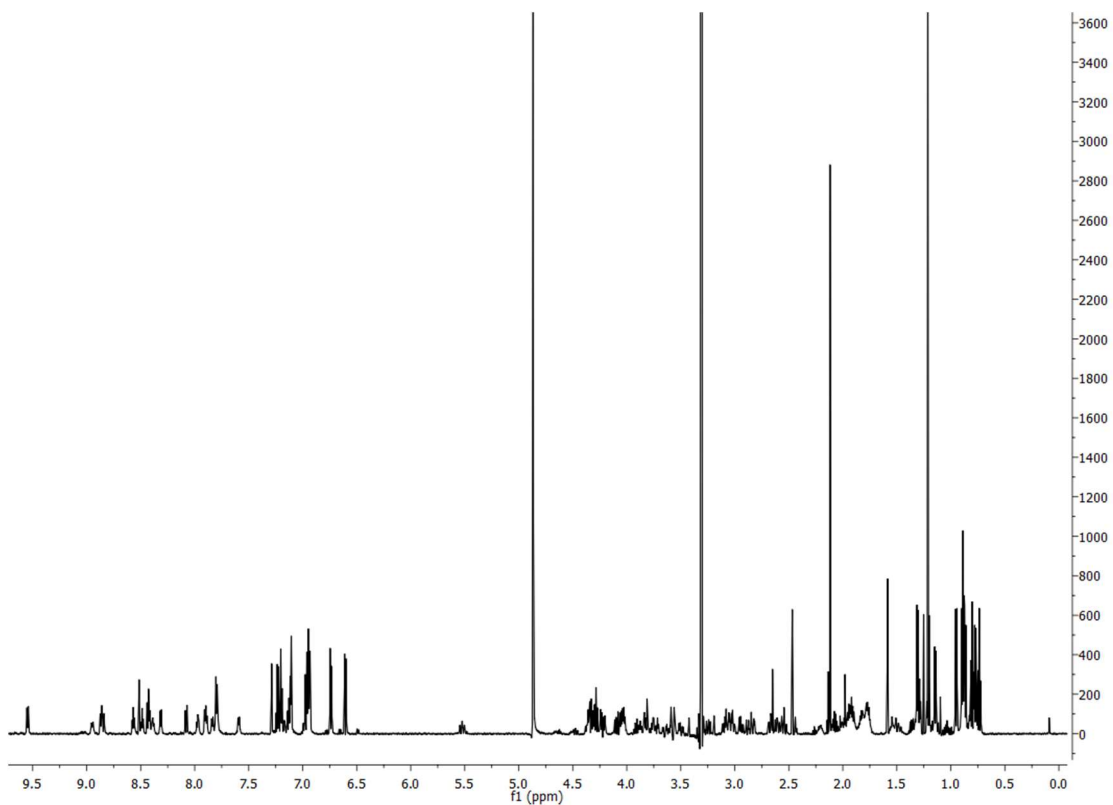

**Figure S12.**  $^1\text{H}$  spectrum of the new compound in  $\text{CD}_3\text{OH}$  at 298K.

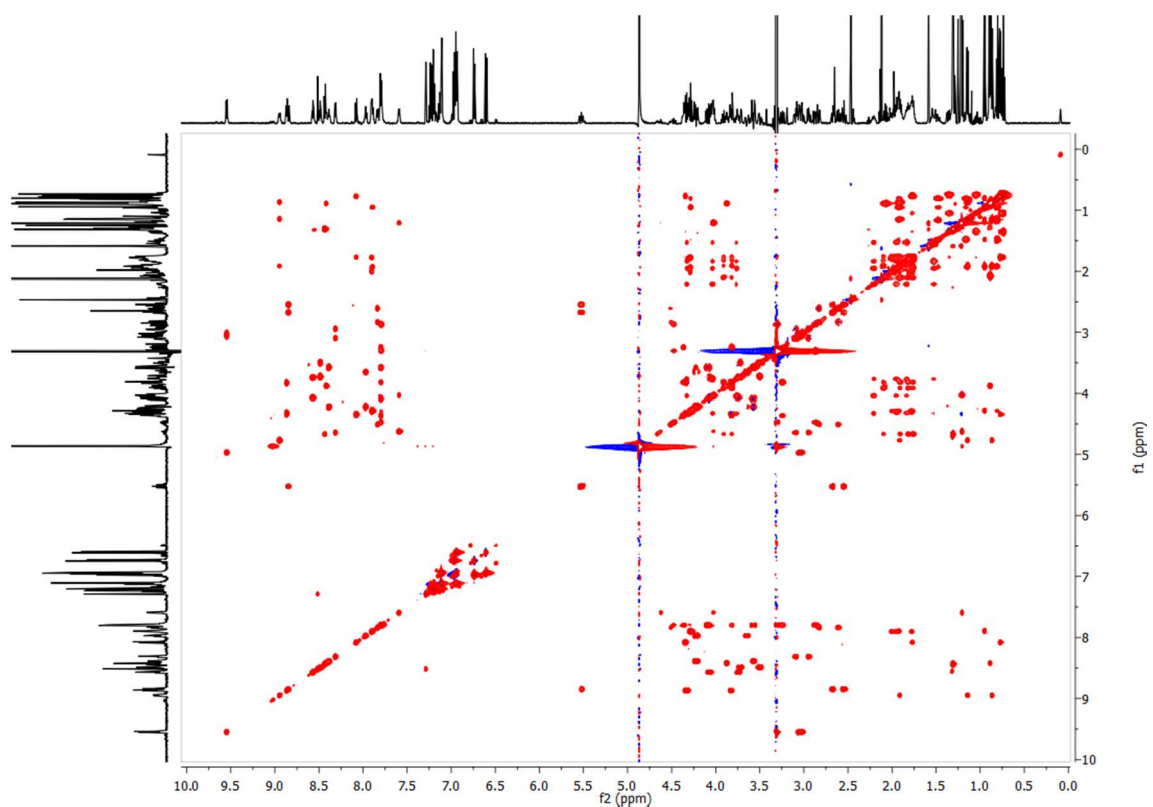

Figure S13. 2D TOCSY spectrum of the new compound in CD<sub>3</sub>OH at 298K.

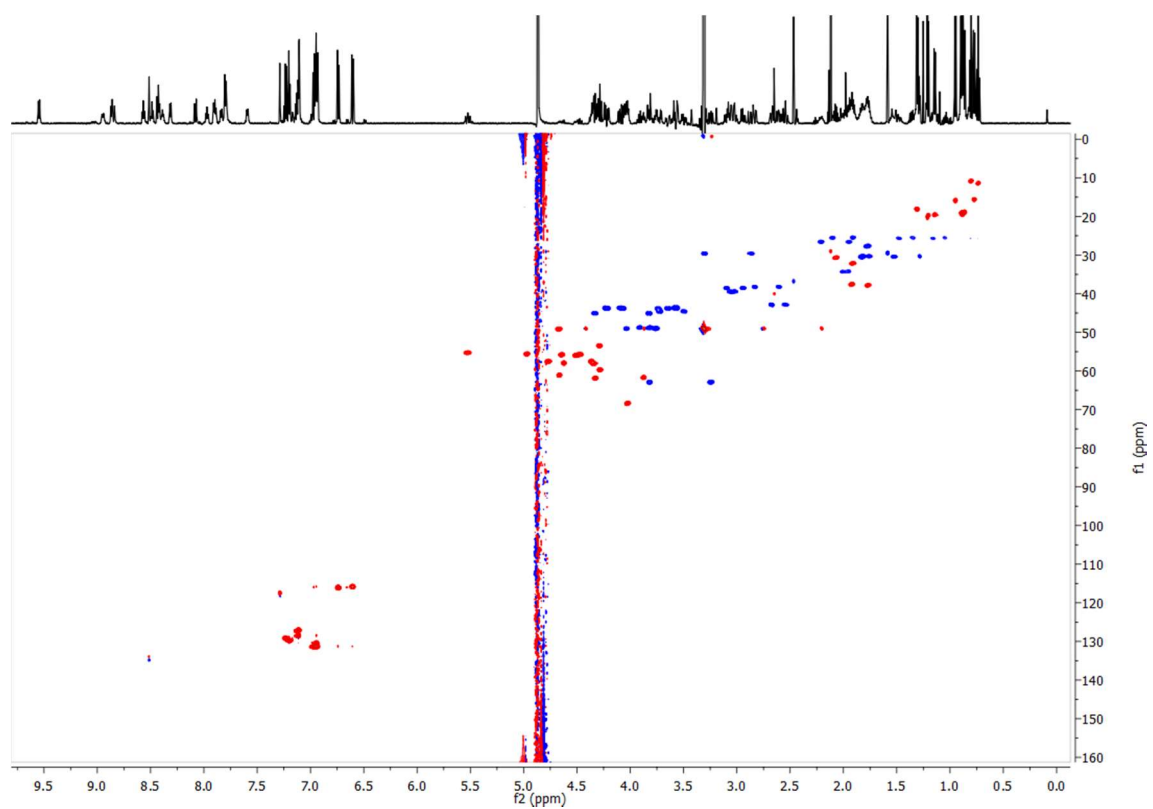

Figure S14. 2D <sup>1</sup>H-<sup>13</sup>C HSQC spectrum of the new compound in CD<sub>3</sub>OH at 298K.

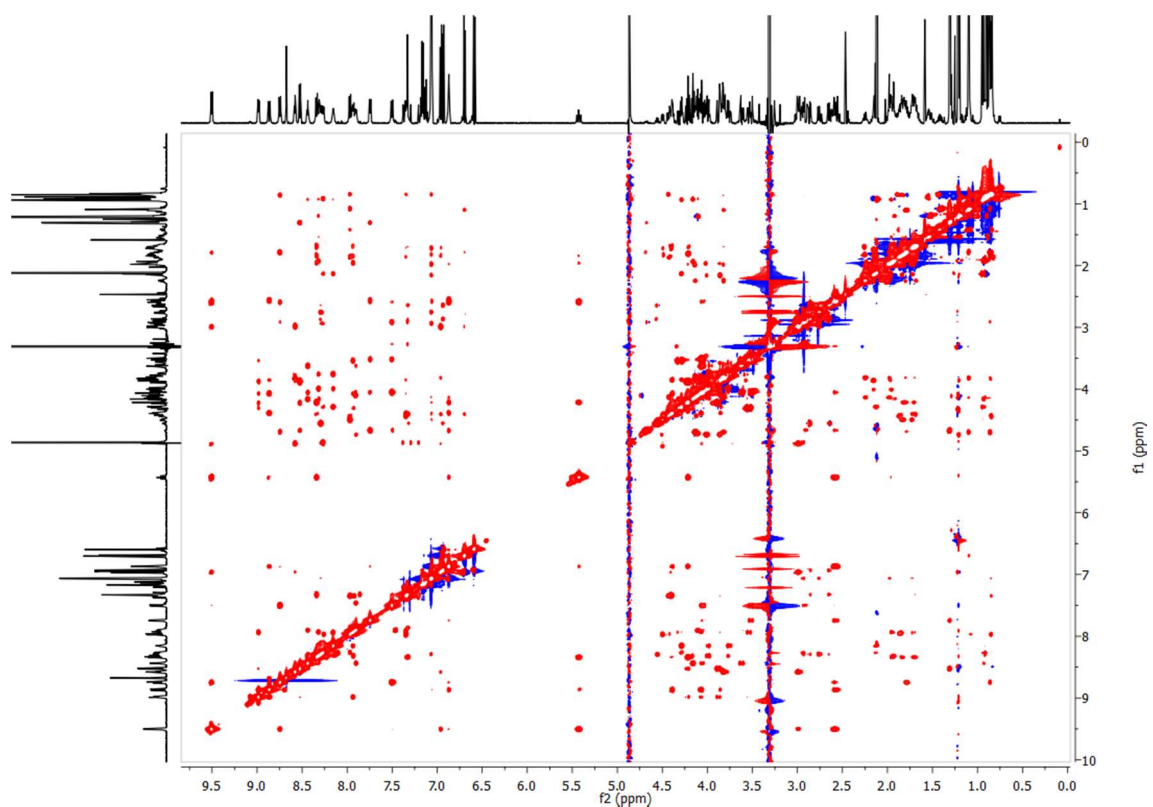

Figure S15. 2D NOESY spectrum of the native MccJ25 in CD<sub>3</sub>OH at 298K.

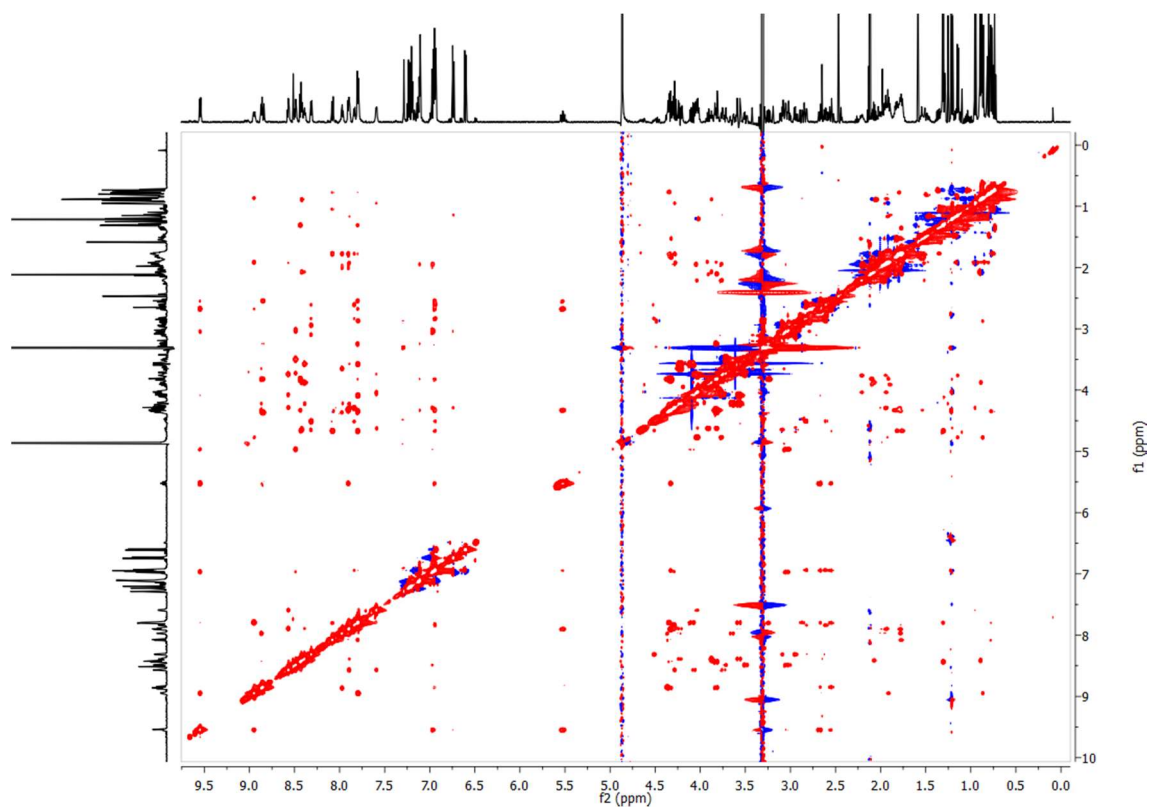

Figure S16. 2D NOESY spectrum of the new compound in CD<sub>3</sub>OH at 298K.

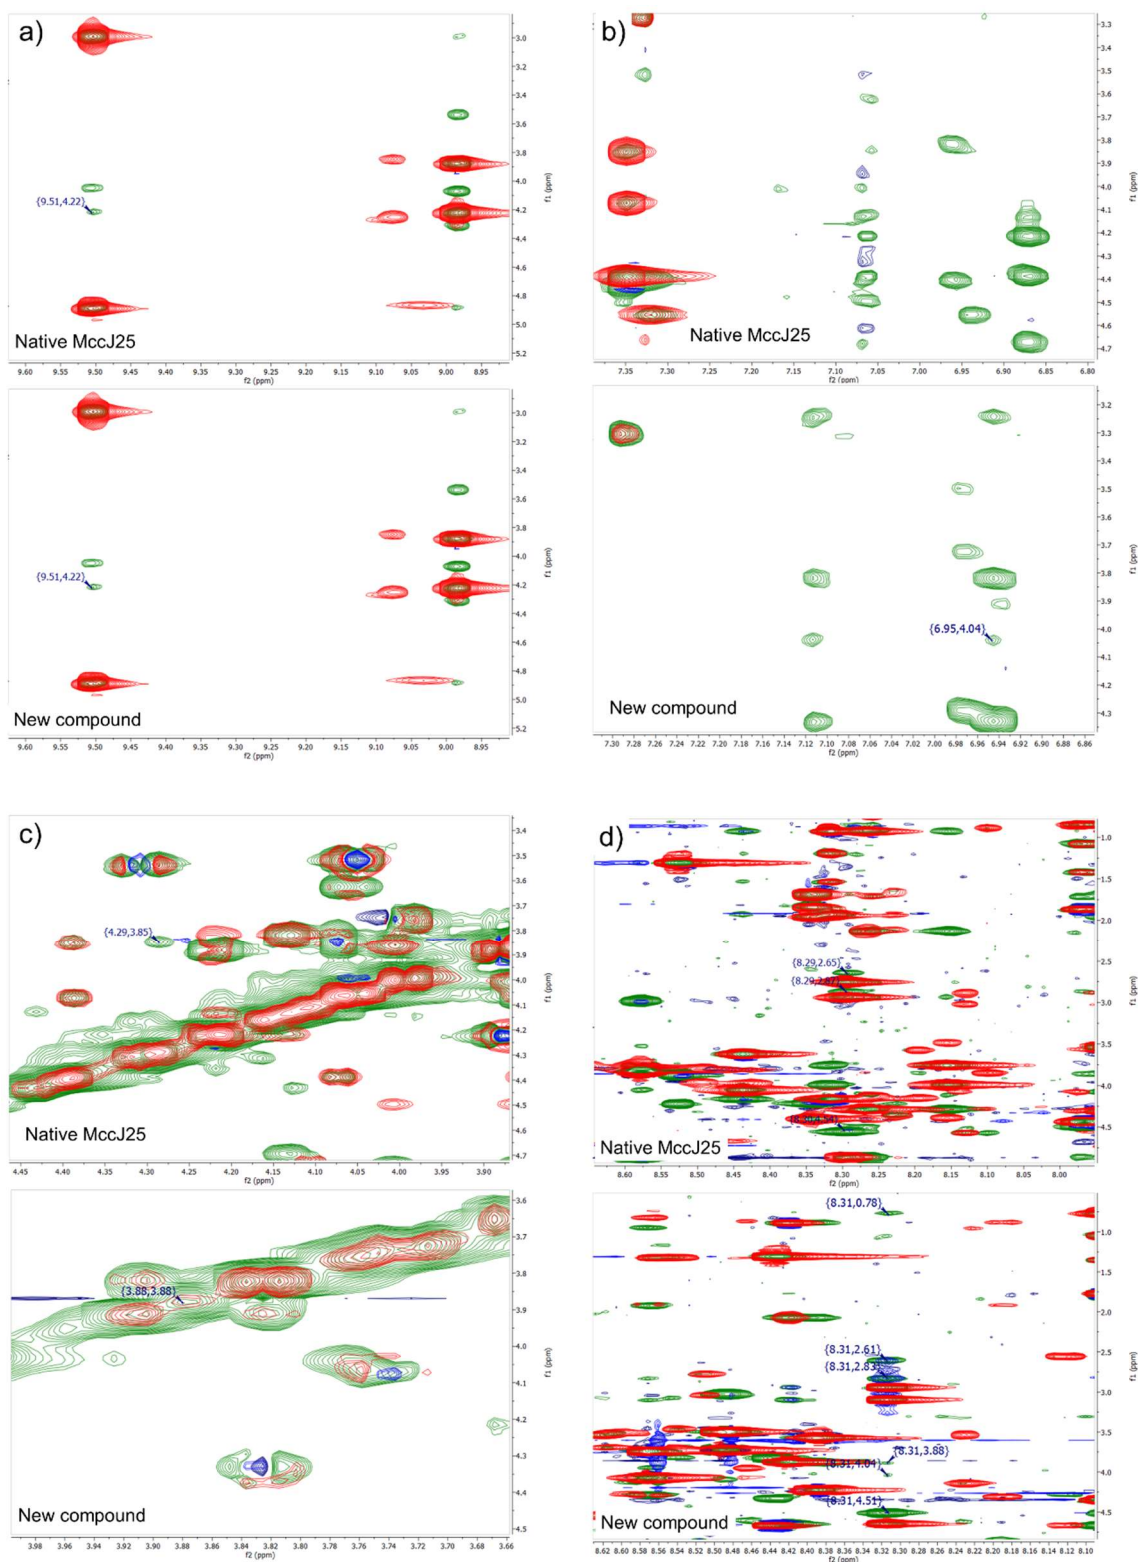

**Figure S17.** Superposition of expanded regions of 2D TOCSY (red) and NOESY (green) spectra of the native MccJ25 and new compound in MeOH-d<sub>3</sub>. NOE cross-peaks are highlighted in the spectra: a) NH Tyr20 – αH Gly2, b) δH Tyr9 – αH Gly14, c) αH Val11 – δH Pro16 and d) NOEs of NH Phe10.

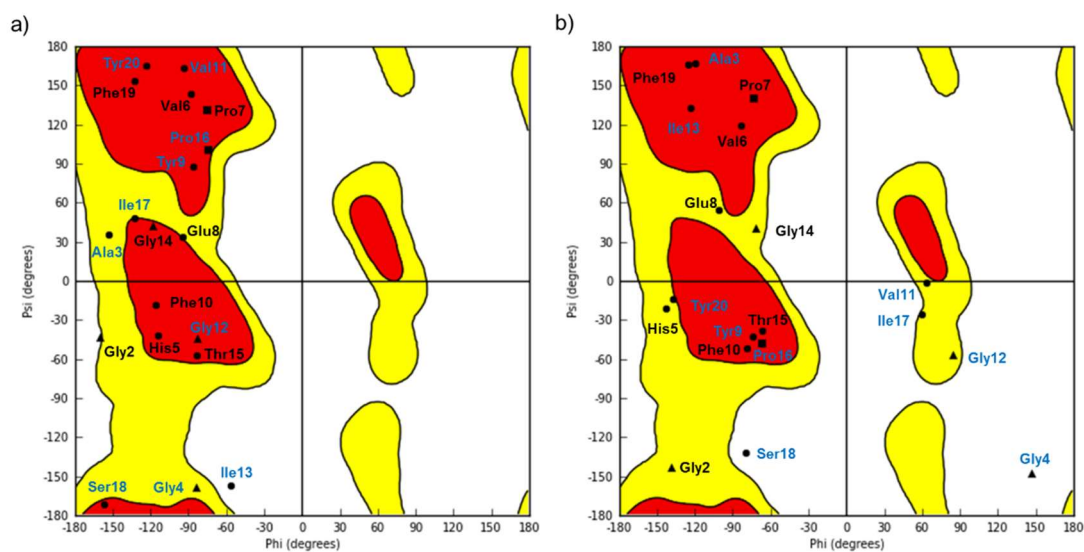

**Figure S18.** Ramachandran plot of the a) native MccJ25 (PDB code 1PP5) and b) lowest-energy structure derived from the NMR restraints of the new compound. The regions denoted in red are the most highly favored regions; in yellow are the additional allowed regions and in white the disallowed regions. The residues located in different region between both structures are shown in blue. The plot is generated using Maestro software.

| Component                          | Amount |
|------------------------------------|--------|
| biotin                             | 0.2 g  |
| choline chloride                   | 1.0 g  |
| disodium adenosine 5'-triphosphate | 0.3 g  |
| folic acid                         | 1.0 g  |
| myo-inositol                       | 2.0 g  |
| nicotinamide                       | 1.0 g  |
| panthothenic acid                  | 1.0 g  |
| pyridoxal hydrochloride            | 1.0 g  |
| riboflavin                         | 0.1 g  |
| thiamine                           | 1.0 g  |
| H <sub>2</sub> O                   | 300 mL |

10 M NaOH were added to the resulting suspension until complete dissolution. The solution was then sterile filtered and stored at 4°C

**Table S13.** M9 minimal medium Vitamin Mix composition



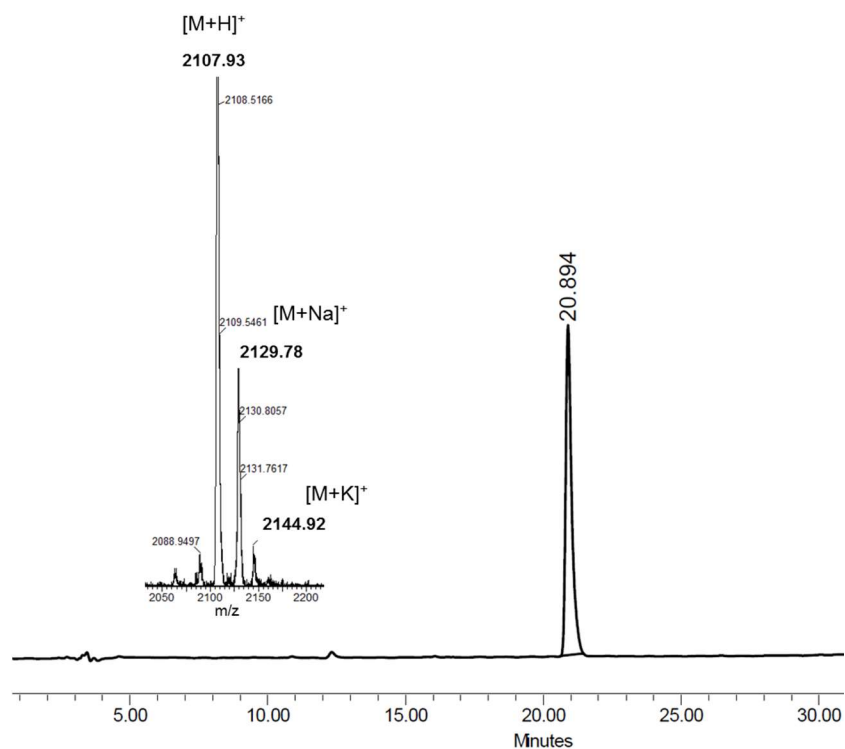

**Figure S19.** RP-HPLC chromatogram and MALDI-TOF spectrum of the native MccJ25. Conditions: Phenomenex Luna C18 5  $\mu\text{m}$  (4.6 mm x 250 mm) reversed-phase analytical column; linear gradient from 25% to 40% of ACN over 40 min at 60°C.

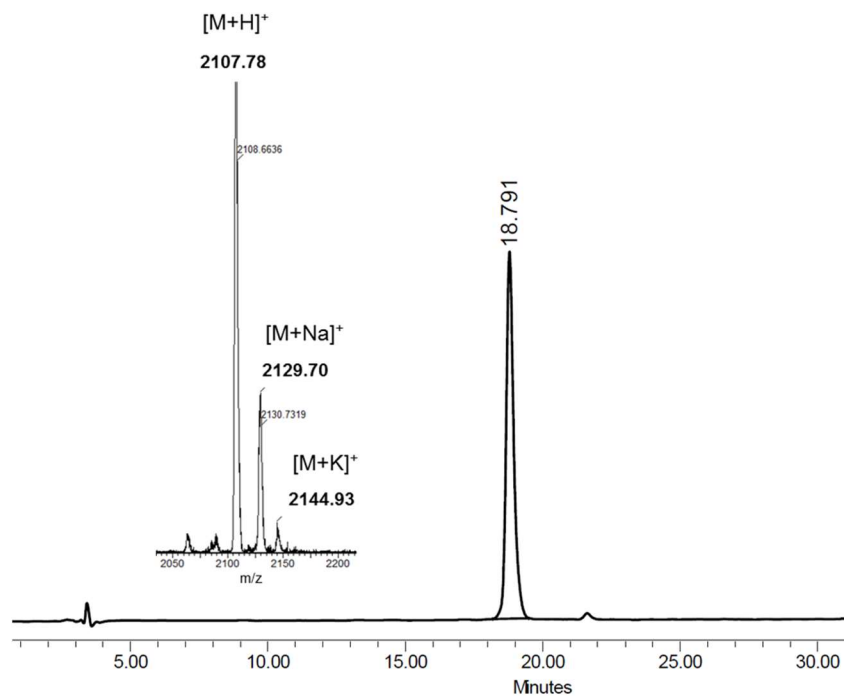

**Figure S20.** RP-HPLC chromatogram and MALDI-TOF spectrum of the new compound. Conditions: Phenomenex Luna C18 5  $\mu\text{m}$  (4.6 mm x 250 mm) reversed-phase analytical column; linear gradient from 25% to 40% of ACN over 40 min at 60°C.



## References

1. Jeanne Dit Fouque, K.; Afonso, C.; Zirah, S.; Hegemann, J.D.; Zimmermann, M.; Marahiel, M.A.; Rebuffat, S.; Lavanant, H. Ion mobility-mass spectrometry of lasso peptides: Signature of a rotaxane topology. *Anal. Chem.* **2015**, *87*, 1166–1172.
2. Smith, D.; Knapman, T.; Campuzano, I.; Malham, R.; Berryman, J.; Radford, S.; Ashcroft, A. Deciphering drift time measurements from travelling wave ion mobility spectrometry-mass spectrometry studies. *Eur. J. Mass Spectrom.* **2009**, *15*, 113–130.
